# Supplementary material
Source: PubMed Central journal article supplement (PMC7899015)
Supplement: NIHMS1605626-supplement-Supplemental_Digital_Content_2.pdf [file NIHMS1605626-supplement-Supplemental_Digital_Content_2.pdf]

## Appendix 1. Investigators and Study Personnel

In addition to the authors, other members of the *Eunice Kennedy Shriver* National Institute of Child Health and Human Development Maternal-Fetal Medicine Units Network are as follows:

*University of Utah Health Sciences Center, Salt Lake City, UT* – M. Varner, A. Sowles, K. Coleman (Utah Valley Hospital), D. Atkinson (Utah Valley Hospital), J. Stratford (McKay-Dee Hospital), S. Dellermann (McKay-Dee Hospital), C. Meadows (McKay-Dee Hospital), S. Esplin (Intermountain Med Ctr), C. Martin (Intermountain Med Ctr), K. Peterson (Intermountain Med Ctr), S. Stradling (LDS Hospital)

*Northwestern University, Chicago, IL* – A. Peaceman, B. Plunkett (NorthShore University), K. Paycheck (NorthShore University), M. Dinsmoor (NorthShore University)

*University of Alabama at Birmingham, Birmingham, AL* – S. Harris, J. Sheppard, J. Biggio, L. Harper, S. Longo (Ochsner), C. Servay (Ochsner)

*Stanford University, Stanford, CA* – C. Willson, D. Lyell, A. Girsen, R. Knapp

*Columbia University, New York, NY* – C. Gyamfi, S. Bousleiman, A. Perez-Delboy, M. Talucci, V. Carmona, L. Plante (Drexel University), C. Tocci (Drexel University), B. Leopanto (Drexel University), M. Hoffman (Christiana Care), L. Dill-Grant (Christiana Care), K. Palomares (St. Peter's Univ. Hosp.), S. Otarola (St. Peter's Univ. Hosp.), D. Skupski (NYP Queen), R. Chan (NYP Queens)

*Brown University, Providence, RI* – D. Allard, T. Gelsomino, J. Rousseau, L. Beati, J. Milano, E. Werner

*University of Texas Medical Branch, Galveston, TX* – A. Salazar, M. Costantine, G. Chiossi, L. Pacheco, A. Saad, M. Munn, S. Jain, S. Clark

*University of North Carolina at Chapel Hill, Chapel Hill, NC* – K. Clark, K. Boggess, S. Timlin, K. Eichelberger (Greenville Memorial Hospital), A. Moore (Greenville Memorial Hospital), C. Beamon (WakeMed Health & Hospitals), H. Byers (WakeMed Health & Hospitals)

*UT Health- University of Texas Medical School at Houston--Children's Memorial Hermann Hospital, Houston, TX* – F. Ortiz, L. Garcia (Harris Health System, Lyndon B. Johnson Hospital), B. Sibai

*The Ohio State University, Columbus, OH* – A. Bartholomew, C. Buhimschi, M. Landon, F. Johnson, L. Webb, D. McKenna (Miami Valley Hospital), K. Fennig (Miami Valley Hospital), K. Snow (Miami Valley Hospital), M. Habli (Good Samaritan Hospital), M. McClellan (Good Samaritan Hospital), C. Lindeman (Good Samaritan Hospital)

*MetroHealth Medical Center-Case Western Reserve University, Cleveland, OH* – W. Dalton, D. Hackney (University Hospital Cleveland), H. Cozart, A. Mayle, B. Mercer

*University of Texas Southwestern Medical Center, Dallas, TX* – L. Moseley, J. Gerald, L. Fay-Randall, M. Garcia, A. Sias, J. Price

*University of Colorado, Denver, CO* – K. Hale, J. Phipers, K. Heyborne

*University of Pennsylvania, Philadelphia, PA* – J. Craig, S. Parry, H. Sehdev (Pennsylvania Hospital)

*Duke University, Durham, NC* – T. Bishop, J. Ferrara

Silver RM, Rice MM, Grobman WA, Reddy UM, Tita ATN, Mallett G, et al. Customized probability of vaginal delivery with induction of labor and expectant management in nulliparous women at 39 weeks of gestation. *Obstet Gynecol* 2020;136.

The authors provided this information as a supplement to their article.

©2020 American College of Obstetricians and Gynecologists.

*University of Pittsburgh, Pittsburgh, PA – M. Bickus, S.. Caritis*

*The George Washington University Biostatistics Center, Washington, DC – L. Doherty, J. de Voest, V. Bhandaru*

*Eunice Kennedy Shriver National Institute of Child Health and Human Development, Bethesda, MD – S. Tolivaisa, M. Miodovnik*

Silver RM, Rice MM, Grobman WA, Reddy UM, Tita ATN, Mallett G, et al. Customized probability of vaginal delivery with induction of labor and expectant management in nulliparous women at 39 weeks of gestation. *Obstet Gynecol* 2020;136.

The authors provided this information as a supplement to their article.

©2020 American College of Obstetricians and Gynecologists.

## Appendix 2. Baseline Characteristics by Inclusion or Exclusion From the Secondary Analysis

| Baseline characteristics                                                                       | Assigned to elective induction of labor at 39 0/7-39 4/7 weeks |                                                                             |        | Assigned to expectant management  |                                                                    |       |
|------------------------------------------------------------------------------------------------|----------------------------------------------------------------|-----------------------------------------------------------------------------|--------|-----------------------------------|--------------------------------------------------------------------|-------|
|                                                                                                | Included in the analysis (n=2153)                              | Excluded from the analysis because not electively induced 39,0-39,4 (n=538) | P*     | Included in the analysis (n=2508) | Excluded from the analysis because not expectantly managed (n=140) | P*    |
| Age, years                                                                                     | 24 (20-28)                                                     | 24 (21-29)                                                                  | 0.02   | 24 (20-28)                        | 23 (20-29)                                                         | 0.42  |
| Age ≥ 35 years                                                                                 | 85 (4.0)                                                       | 19 (3.5)                                                                    | 0.65   | 116 (4.6)                         | 10 (7.1)                                                           | 0.17  |
| Race or ethnic group                                                                           |                                                                |                                                                             | 0.04   |                                   |                                                                    | 0.001 |
| Black                                                                                          | 492 (22.9)                                                     | 128 (23.8)                                                                  |        | 583 (23.3)                        | 21 (15.0)                                                          |       |
| White                                                                                          | 960 (44.6)                                                     | 204 (37.9)                                                                  |        | 1133 (45.2)                       | 57 (40.7)                                                          |       |
| Asian                                                                                          | 53 (2.5)                                                       | 20 (3.7)                                                                    |        | 88 (3.5)                          | 4 (2.9)                                                            |       |
| Hispanic                                                                                       | 594 (27.6)                                                     | 173 (32.2)                                                                  |        | 641 (25.6)                        | 57 (40.7)                                                          |       |
| Other, unknown, or more than one race                                                          | 54 (2.5)                                                       | 13 (2.4)                                                                    |        | 63 (2.5)                          | 1 (0.7)                                                            |       |
| Private insurance                                                                              | 1004 (46.7)                                                    | 235 (43.7)                                                                  | 0.22   | 1102 (43.9)                       | 57 (40.7)                                                          | 0.45  |
| Height, m                                                                                      | 1.63 (1.57-1.68)                                               | 1.60 (1.57-1.66)                                                            | <0.001 | 1.63 (1.57-1.68)                  | 1.60 (1.57-1.65)                                                   | 0.04  |
| Weight at randomization, kg                                                                    | 81 (72-94)                                                     | 78 (71-91)                                                                  | 0.004  | 81 (71-93)                        | 82 (71-93)                                                         | 0.95  |
| History of pregnancy loss before 20 weeks                                                      | 475 (22.1)                                                     | 120 (22.3)                                                                  | 0.90   | 648 (25.8)                        | 35 (25.0)                                                          | 0.83  |
| Conception assisted by ovulation induction, artificial insemination, or in vitro fertilization | 64 (3.0)                                                       | 12 (2.2)                                                                    | 0.35   | 61 (2.4)                          | 3 (2.1)                                                            | 1.00  |
| Modified Bishop score at randomization                                                         | 4 (2-5)                                                        | 4 (2-5)                                                                     | 0.01   | 4 (2-5)                           | 4 (2-5)                                                            | 0.85  |
| Modified Bishop score at randomization < 5                                                     | 1409 (65.4)                                                    | 324 (60.2)                                                                  | 0.02   | 1691 (67.5)                       | 92 (65.7)                                                          | 0.67  |

Silver RM, Rice MM, Grobman WA, Reddy UM, Tita ATN, Mallett G, et al. Customized probability of vaginal delivery with induction of labor and expectant management in nulliparous women at 39 weeks of gestation. *Obstet Gynecol* 2020;136.

The authors provided this information as a supplement to their article.

©2020 American College of Obstetricians and Gynecologists.

---

Data are median (interquartile range) or n (%) unless otherwise specified.

\* Based on the  $\chi^2$  or Fisher's exact test for categorical variables and the Wilcoxon rank sum test for continuous variables..

---

Silver RM, Rice MM, Grobman WA, Reddy UM, Tita ATN, Mallett G, et al. Customized probability of vaginal delivery with induction of labor and expectant management in nulliparous women at 39 weeks of gestation. *Obstet Gynecol* 2020;136.

The authors provided this information as a supplement to their article.

©2020 American College of Obstetricians and Gynecologists.

**Appendix 3. Graphical displays of the observed and expected number of patients in each partition of the Hosmer-Lemeshow test: elective induction of labor (eIOL) model (Figures A-B); expectant management model (EM) (Figures C-D).**

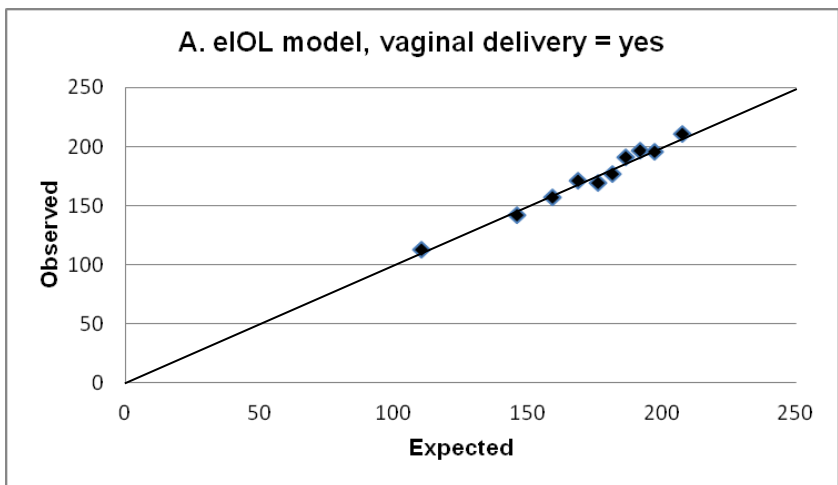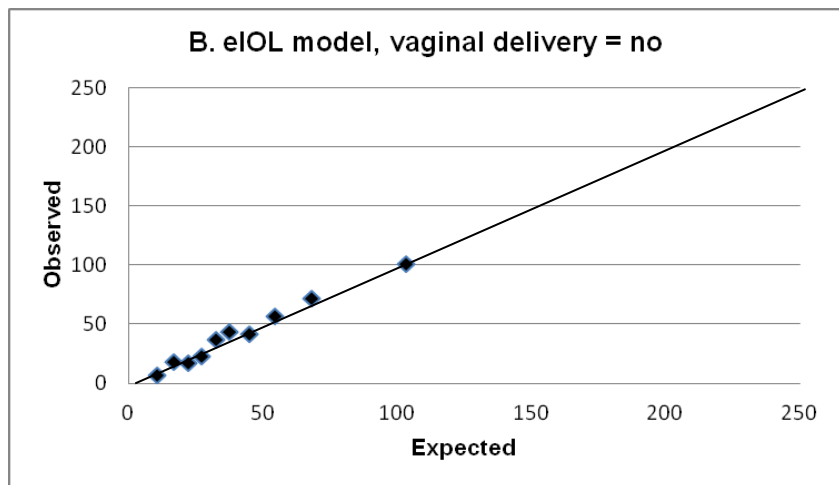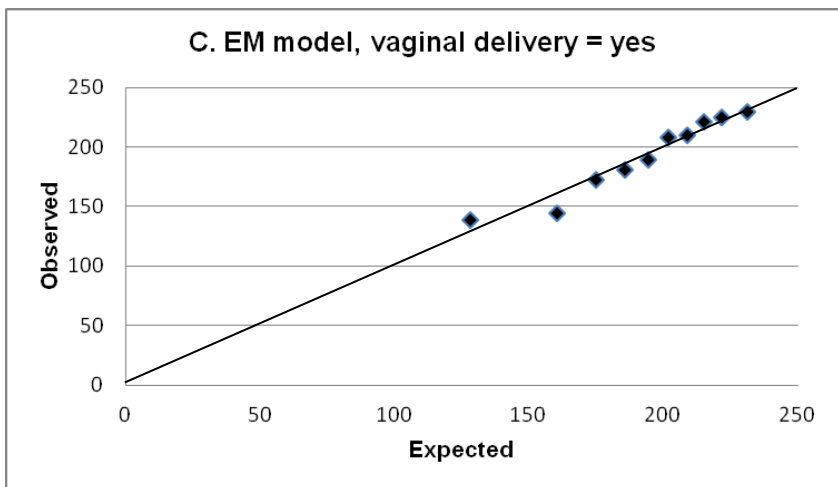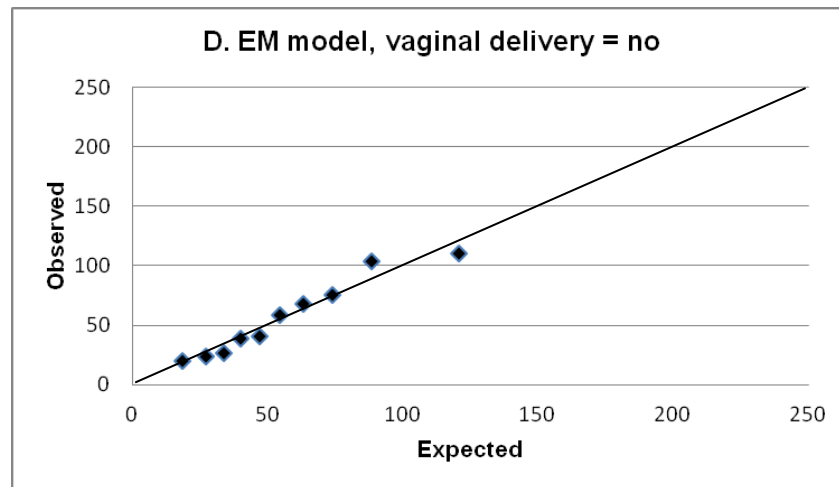

Silver RM, Rice MM, Grobman WA, Reddy UM, Tita ATN, Mallett G, et al. Customized probability of vaginal delivery with induction of labor and expectant management in nulliparous women at 39 weeks of gestation. *Obstet Gynecol* 2020;136.

The authors provided this information as a supplement to their article.

©2020 American College of Obstetricians and Gynecologists.

**Appendix 4. Logistic Regression Equations to Determine the Percent Probability of Vaginal Birth for an Individual Low-Risk Nulliparous Pregnancy at 39 Weeks of Gestation With Elective Induction of Labor (eIOL) and With Expectant Management (EM)**

---

Probability of vaginal delivery with eIOL 39 0/7-39 4/7 weeks of gestation equation\*

$$p(\text{vaginal delivery}) = \{1 - [1 / (1 + \{\text{EXP}[-9.4313 + (-0.0681 * \text{maternal age in years}) + (8.6742 * \text{maternal height in meters}) + (-0.0261 * \text{maternal weight in kilograms at 38 weeks of gestation}) + (0.2141 * \text{modified Bishop score at 38 weeks})]\})]\} * 100$$

---

Probability of vaginal delivery with EM started at 39 0/7 weeks of gestation equation\*

$$p(\text{vaginal delivery}) = \{1 - [1 / (1 + \{\text{EXP}[-5.5357 + (-0.0679 * \text{maternal age in years}) + (5.9541 * \text{maternal height in meters}) + (-0.0227 * \text{maternal weight in kilograms at 38 weeks of gestation}) + (0.2140 * \text{modified Bishop score at 38 weeks})]\})]\} * 100$$

---

\* Use whole numbers for maternal age in years and modified Bishop score at 38 weeks and use up to two decimal places for maternal height in meters and maternal weight at 38 weeks of gestation in kilograms.

Silver RM, Rice MM, Grobman WA, Reddy UM, Tita ATN, Mallett G, et al. Customized probability of vaginal delivery with induction of labor and expectant management in nulliparous women at 39 weeks of gestation. *Obstet Gynecol* 2020;136.

The authors provided this information as a supplement to their article.

©2020 American College of Obstetricians and Gynecologists.
